# Supplementary material
Source: Springer Nature journal article supplement (https://www.springermedizin.de/resource/supplementary/12887_2014_1197_MOESM1_ESM.pdf/9476804)
Supplement: MOESM1 [file 9476804]

**540 Screened**

**102 Ineligible**

82 mothers not staying in the study communities  
17 mothers not contacted within 7 days of birth  
3 babies <1500 grams

**438 Eligible**

**407 Consented and Randomized**

**203 Randomized to control group**

**204 Randomized to  
Early Developmental Intervention**

**19 Drop outs**

7 deaths  
6 withdrawals  
5 lost to follow-up  
1 child's mother nursing husband out of town

**185 Evaluations at 36m**

**39 BSID-II Incomplete**

**146 BSID-II Completed**

**1 missing home visit information**

**145 provided data for  
treatment dose analysis**
